# Supplementary material for: The pH sensitivity of Aqp0 channels in tetraploid and diploid teleosts
Source: PubMed Central journal article supplement (PMC4423293; doi:10.1096/fj.14-267625), 2015-02-09
Supplement: supp_fj.14-267625_Supplemental_Figure1.pdf [file supp_fj.14-267625_Supplemental_Figure1.pdf]

## Supplemental Figure S1

A

### 5' end UTR

```

aqp0a1 -146 CTTTGAAGTTTGCTCTCTGTTTTTTT---TATCCTACCTGAAGGCATCA-----CTGAGAT--AGTCATTA
aqp0a2 -181 CTTTTAAGTTTGCTGTCTGTTTTTTTGTATATACTACCTGAAGGCATCA-----CTGAGAT--AGTCATTA
aqp0b1 -173 CGTTTTGGGTCAGC---CCAGCAAACCTG-----ACCTCCAAAGGGATAAAA-----AAAAAAATTAAGTG----
aqp0b2 -186 CGTTTTAGGTCAGC---CCAGCTAGCTG-----ACTGCCAAAGGGAAATCACTTTTTTTTTTTTTTTTGCATCTGAAAC--AGTG----
          * **      ** **      * *      * *      * *      * *      * *      * *      * *      * *      * *
          * **      ** **      * *      * *      * *      * *      * *      * *      * *      * *      * *

aqp0a1 -89 TTGATACGCTGAGCAGAGCTAGCTCACTCTAAAGGAGAATACACATTT-----GGGGTAGC-----CAT-----
aqp0a2 -116 TTGATACGGTAAACAGAGCTTGGTGACTCAAAGGAGAATACACATTTT---CTCCTGTTTTCGCTCCTCTCTCATCCCTCCATTGC-
aqp0b1 -116 -CAAAACGAGTAACAAGACT-----TTTAAACG---TACACGCTGCCTTTTCTAGATTAC---CTTGACAACTTTTTGTGTT
aqp0b2 -111 -CAAAAAATCACCTAGACT-----TTTAAAGG---TACAAGCTT---TTTCTAGATTAC---CCCAACAACTTTTTTCCC---
          * *      * *      **      * *      * *      * *      * *      * *      * *      * *      * *

aqp0a1 -30 --TTGGGCTAGCCTCTTGACTTTT-----TGGCCACC -1
aqp0a2 -31 -TTTGGGCTAGCATCTTGACTTTT-----TGGCCACC -1
aqp0b1 -42 GTTGAGAAAAACATTTTCTGTTACAAGGAGTG-----AACAGCCAGC -1
aqp0b2 -43 -----AAGAACATTTTCCGTTCTGAGGAGCGTCCAGTAAACGGCCAGC -1
          * *      * *      * *      * *      * *      * *      * *      * *      * *      * *
  
```

B

### 3' end UTR

```

aqp0a1 793 GCCTGG---TGAAGAAGGTTGGCTTTCTGAACCCACATTCCTTATTCCTGACCCAAACCTCCTCCGAACCCTCAACCCTACCAACA
aqp0a2 793 GCCTGG---TGAAGA-----
aqp0b1 793 ACCTGCACCTGTCTGG-----
          ****      **

aqp0a1 879 CACATACACACACATTACTCTCTCTCTAATCCACACACCCACATAGTACACACAGACCACCACGACAACCTCCACCTTTCTCACCCCT
aqp0a2 -----
aqp0b1 -----

aqp0a1 968 CTCATCCTTACTCTGTGATCCAGAAACAGTACATGCTGAGTTACTGGGAAGCCAAAGCCCTAACCCCTCCTCCGACCTGTGAACACTATGA
aqp0a2 806 -----AGAAACAGGACATGCTGAATTACAGGGCAGCCAAAGCCCTAACCCCTCCTCCGACCTGTGAACACTATGACCACTGA
aqp0b1 809 -----GGACAAGGGACGAG-----GGACAG-----GCCCTG--TGTCGGCCAAC-CCCCA-CGCTGG
          ** *      * *      * *      * *      * *      * *      * *      * *      * *      * *

aqp0a1 1057 CCCC-----CTCCCCCTTGGACTGCAGAACAAAGATGGAGGGTAAGAAGAGGACTTAGTTGC-CACTGAAGAAAGCACCCCTGCT
aqp0a2 873 CCCTTACCCATACCTCCCCCTTGGACTGCAGGATAAAGATGGAGGGTAAGAAGAGGACTTAGTTGC-CACTGAAGAAAGCACCCCTGCT
aqp0b1 857 CCC-----CATCCCATGAGC-----ACATATACAGTCCCT-----CTCATTGACTCACTAATAACACACACACCC
          ***      * *      * *      * *      * *      * *      * *      * *      * *      * *

aqp0a1 1137 GCGGC-CTGTTGTGTAGGGAGTGGGTGACTCCTGGCTGACCAGGTGGCTGTAAGTCTCAGGACAGGGGCATCTCTCTCTCTCTTTTTC
aqp0a2 961 GTGGC-CTGTGGTGTAGGGAATGGGTCACTCCTGGCTGACCAGGTGGCTATAACTGCTCAGGACAGGGGCATCTCTCTCTCT-----C
aqp0b1 918 ATGTCGCTACGA--CAGGCGGCCAGTGA-----GGCAAGCGAGCAAACTCTGA--GTT-----GATGTTGACTGCCT-----
          * *      * *      * *      * *      * *      * *      * *      * *      * *      * *

aqp0a1 1225 TCTCTATATTTTG-TAGTCTGTAGGAGTGAAGCTACAGTAGAGCAGTGAACCTCATGCTTTTTCCATTTTTATGAAACTTCTGGTAC
aqp0a2 1043 TCTCT-TGTTT-G-TAGTCTGTAGGAGTGAAGCTACAGTAGAGCAGTGGACTTC-----
aqp0b1 982 TCGCCAACTTGAGATCGTCCGT--AGCTTAGAGCTAGATCTGTATGGTGGATTCC-----
          ** *      * *      * *      * *      * *      * *      * *      * *      * *

aqp0a1 1303 CTAATGTGCATGTTATTATTATGCCCTTGAAGAATTTATGAGGATTTTTTCAACTCTAGTTATATTTTCAAGTCATGCATTGTGTTGT
aqp0a2 1095 -----TGCATG-----CTT-----TTTA-----ATTTTTTCA--TCCAGTTTGAATCTC-----TCCTTGTGTT--
aqp0b1 1035 -----TCTG-----TCA-----ACTTTTTTAA---CTGTTTG--TCTT-----CCAACTG-----
          * *      * *      * *      * *      * *      * *      * *      * *

aqp0a1 1402 TTGTGCGTGTTTTAGAAGACCATTGTTATTTTTATTT 1438
aqp0a2 1144 -----TTATTGTTTTTGTTT 1158
aqp0b1 1070 -----ATTGGCTAAGTAA 1082
          * *      *
  
```
